# Supplementary material
Source: Springer Nature journal article supplement (https://www.springermedizin.de/resource/supplementary/13550_2013_177_MOESM9_ESM.pdf/9687748)

**a**

probe

competition

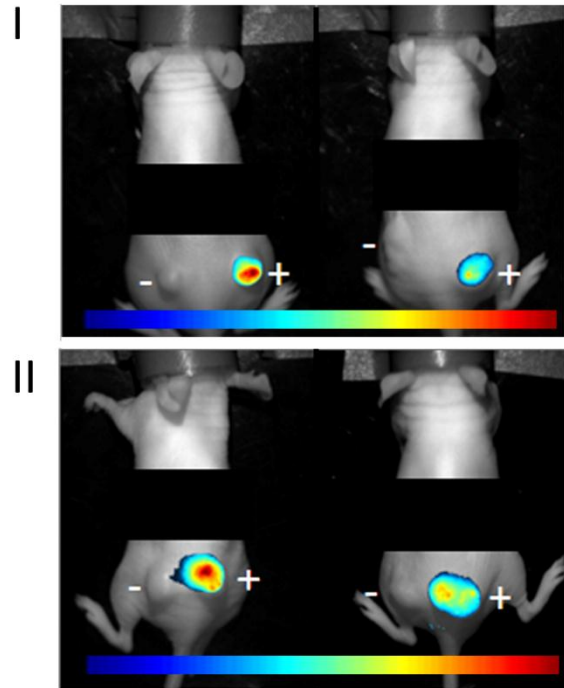**b**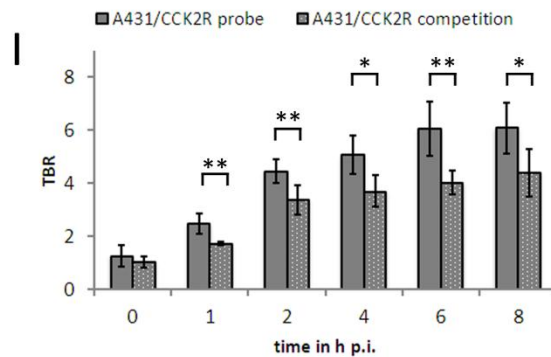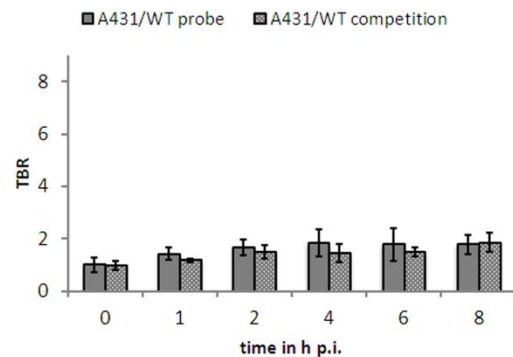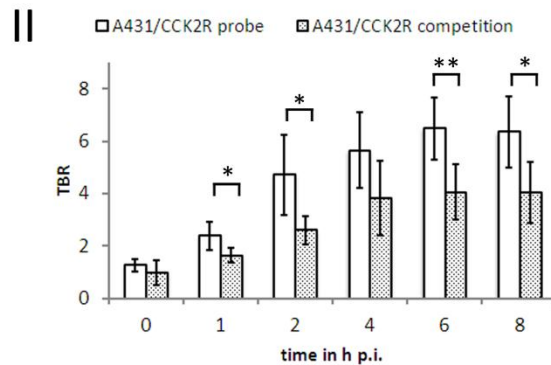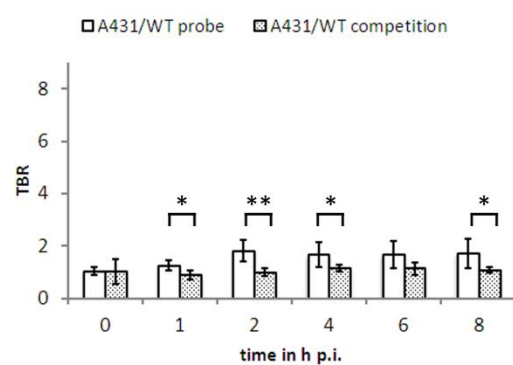

Supplement: MOESM9 [file 9687748]
